# Supplementary material for: An improved microscale method for extraction of phenolic acids from maize
Source: Plant Methods. 2017 Oct 10;13:81. doi: 10.1186/s13007-017-0235-x (PMC5634950; doi:10.1186/s13007-017-0235-x)
Supplement: Supplementary file 2 — Additional file 2. Comparison of total phenolic acids determination by conventional and improved methods. *Results are expressed as the average of three replicates as mg of gallic acid equivalent per 100 g dry weight (mg GAE/100 g dw). Min: minimum value of the data, Max: maximum value of the data. LSD: Least significant difference (α = 0.05). [file 13007_2017_235_MOESM2_ESM.xlsx]

## Sheet: Sheet1
	Supplementary table 2. Comparison of total phenolic acids determination by conventional and improved methods (*).
	Sample	Free		Bound
		Conv	Micro	Conv	Micro
	EHYM-401-US	191.46	230.49	680.09	623.95
	EHYM-402-US	166.39	233.68	958.65	976.84
	EHYM-403-US	222.53	237.97	720.82	704.37
	EHYM-404-US	200.83	247.24	725.75	704.32
	EHYM-405-US	245.61	248.17	873.81	753.89
	EHYM-406-US	190.8	221.23	589.02	762.28
	EHYM-407-US	263.29	141.66	248.34	681.58
	EHYM-408-US	225.13	230.9	1131.22	1165.27
	EHYM-409-US	235.25	199.92	1013.62	1017.36
	EHYM-410-US	244.44	240.61	840.31	861.67
	EHYM-411-US	202.34	125.17	888.34	805.06
	EHYM-412-US	297.7	254.27	812.11	859.73
	EHYM-413-US	605.25	664.36	919.09	825.5
	EHYM-414-US	267.11	682.04	880.15	843.89
	EHYM-415-US	258.32	221.02	935.03	830.89
	EHYM-416-US	229.63	220.13	1158.39	1140.52
	EHYM-418-US	587.91	556.78	1020.73	1005.7
	EHYM-419-US	242.17	235.36	1010.86	1059.03
	EHYM-420-US	240.74	237.36	322.31	777.31
	Min	166.39	125.17	248.34	623.95
	Mean	269.31	285.7	827.82	862.06
	Max	605.25	682.04	1158.39	1165.27
	LSD	106.4	10.8	61.1	26.7
